# Supplementary material
Source: publisher figshare collection journal article supplement (https://karger.figshare.com/ndownloader/files/25263389)
Supplement: Supplementary file 1 [file 25263389]

## ***Supplementary Material***

### ***Ontogeny and Dynamics of the Gonadal Development, Embryogenesis and Gestation in Xenotoca eiseni (Cyprinodontiformes, Goodeidae)***

Simone M. Tinguely, Anke Lange, Charles R. Tyler\*

University of Exeter, Biosciences, College of Life & Environmental Sciences, Exeter EX4 4QD, United Kingdom

\* Corresponding Author: Phone +44 (0)1392 264450; Fax +44 (0)1392 724000; Email: C.R.Tyler@exeter.ac.uk

#### **This supplementary material contains:**

**Table S1:** Numbers of fish analysed for the various endpoints on the specified sampling dates.

**Page S2**

**Figure S1:** Growth and development of secondary sex characteristics of *Xenotoca eiseni* from birth until the age of six months.

**Page S3**

**Figure S2:** Lateral section of an adult (12-week-old) female *Xenotoca eiseni* showing the position of the gonad.

**Page S4**

**Figure S3:** Transverse whole body sections of *Xenotoca eiseni* immediately after birth showing the position of the gonads.

**Page S5**

**Figure S4:** Sections of *Xenotoca eiseni* at different ages, focused on the gonads.

**Page S6**

**Figure S5:** Histological sections of *Xenotoca eiseni* testes.

**Page S8**

**Figure S6:** Scheme of a mature, non-gravid ovary.

**Page S9**

**Figure S7:** Lateral histological section of an ovary of *Xenotoca eiseni* one week after fertilization.

**Page S10**

**Figure S8:** Transverse histological section of an ovary (six weeks into gestation) of *Xenotoca eiseni* with 18 embryos.

**Page S11**

**Figure S9:** Female *Xenotoca eiseni* at parturition.

**Page S12**

## *Supplementary Material*

**Table S1:** Numbers of fish analyzed for the various endpoints on the specified sampling dates.

Various numbers of randomly sampled fish were sacrificed at each sampling point for histological analysis of gonadal development and gestation. Body weight and total body length were measured for all fish remaining in the study at the respective sampling dates. A total of four fish died during the first experiment: two in the first week, one between week 2 and week 4 and one between week 4 and week 8. **Key:** f: female, m: male.

| Study                           | Sampling Time | Weight and Length     | Histology            |
|---------------------------------|---------------|-----------------------|----------------------|
| Ontogeny of gonadal development | Day 1         | 172 fish              | 19 fish              |
|                                 | Week 1        | 151 fish              | 20 fish              |
|                                 | Week 2        | 131 fish              | 20 fish              |
|                                 | Week 4        | 110 fish              | 19 fish              |
|                                 | Week 8        | 90 fish (41 f + 49 m) | 16 fish (8 f + 8 m)  |
|                                 | Week 12       | 74 fish (33 f + 41 m) | 19 fish (9 f + 10 m) |
|                                 | Month 4       | 55 fish (24 f + 31 m) | 20 fish (9 f + 11 m) |
|                                 | Month 5       | 35 fish (15 f + 20 m) | 16 fish (8 f + 8 m)  |
|                                 | Month 6       | 19 fish (7 f + 12 m)  | 19 fish (7 f + 12 m) |
| Embryogenesis and gestation     | Day 2         | 33 fish               | 33 fish              |
|                                 | Day 3         | 33 fish               | 33 fish              |
|                                 | Day 5         | 22 fish               | 22 fish              |
|                                 | Week 1        | 85 fish               | 22 fish              |
|                                 | Week 2        | 63 fish               | 21 fish              |
|                                 | Week 4        | 42 fish               | 21 fish              |
|                                 | Week 6        | 21 fish               | 21 fish              |

## Supplementary Material

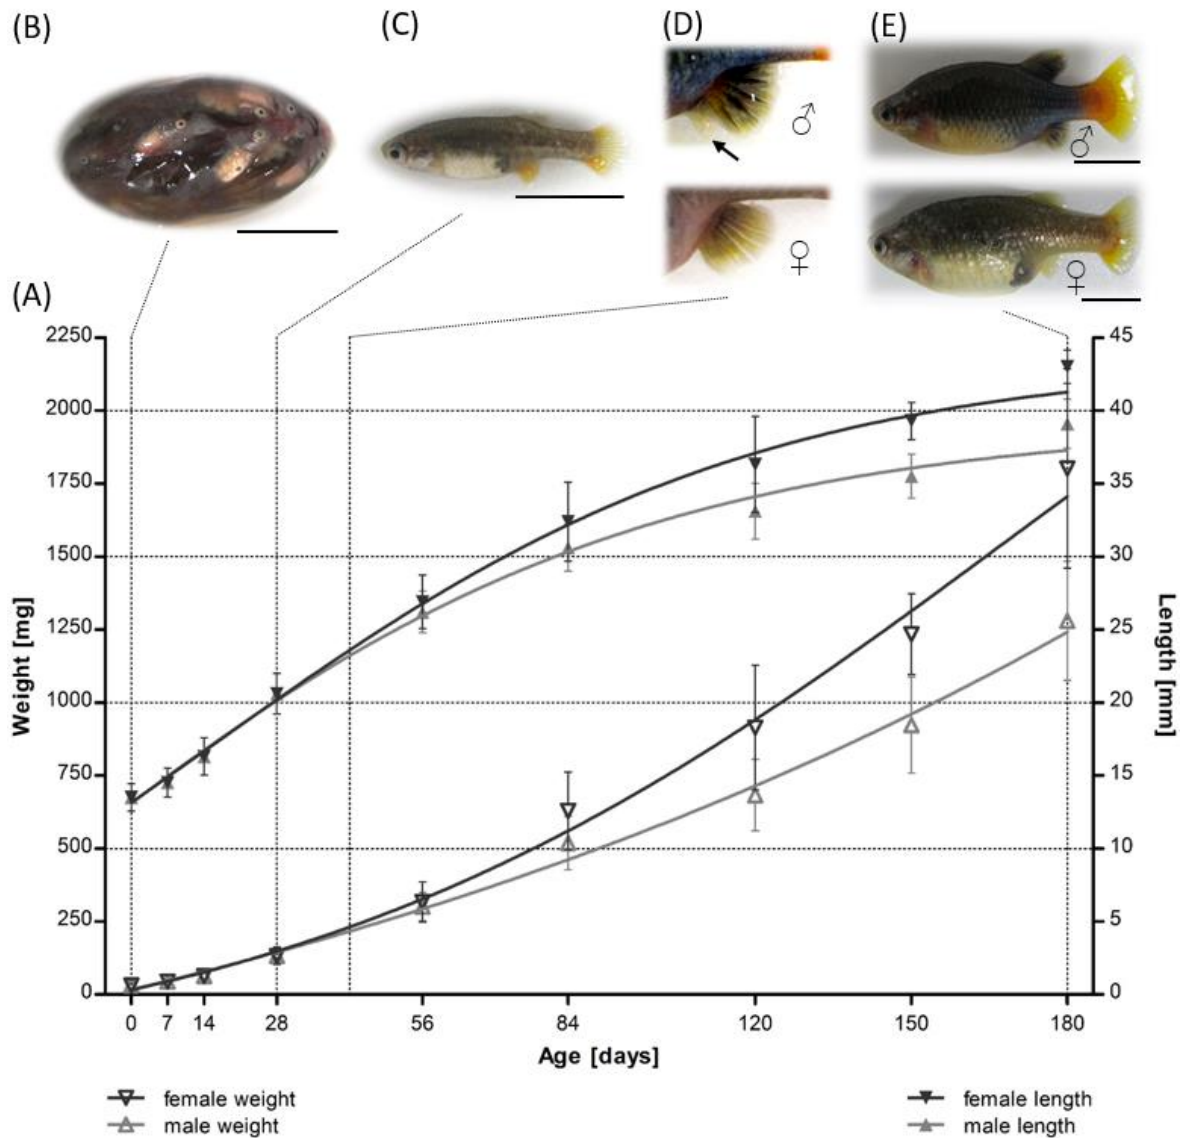

**Figure S1:** Growth and development of secondary sex characteristics of *Xenotoca eiseni* from birth until the age of six months. **A** Wet weight and total body length of male and female fish. Unpaired t-tests revealed no significant differences between male and female (non-pregnant fish only) growth. **B-E** Illustrations of *X. eiseni* at different ages (at birth (**B**), at four weeks (**C**) and six months of age (**E**)). **D** Anal fins at the age between four and eight weeks (period indicated by the vertical dotted lines) show the notch and the andropodium in the male indicated by the arrow. Bars = 1 cm.

## Supplementary Material

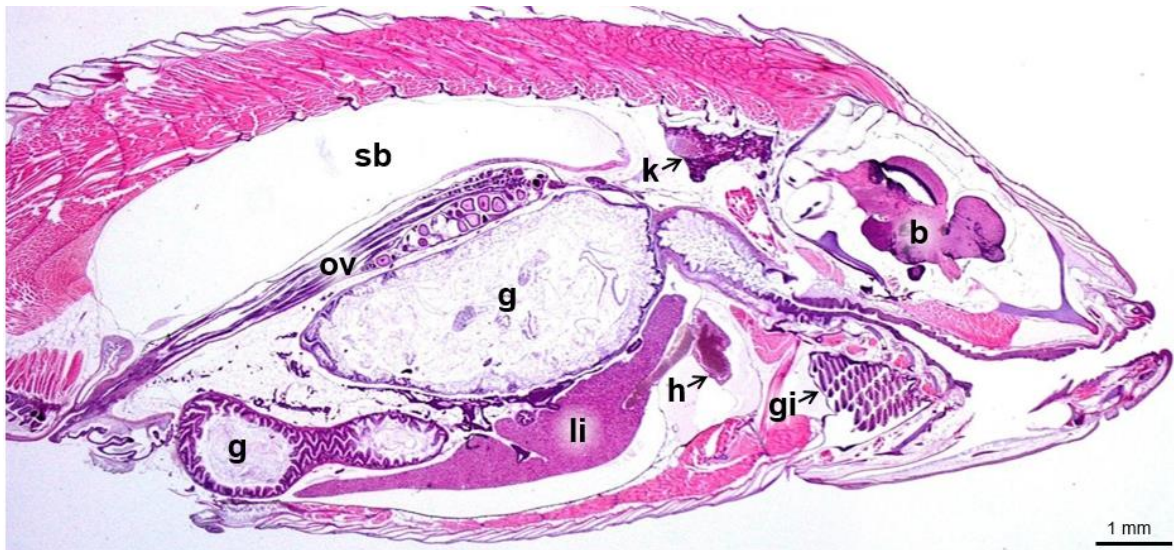

**Figure S2:** Lateral section of an adult (12 week old) female *Xenotoca eiseni* showing the position of the gonad. **Key:** b: brain, g: gut, gi: gills, h: heart, k: kidney, li: liver, ov: ovary (with oocytes at different developmental stages), sb swim bladder.

## Supplementary Material

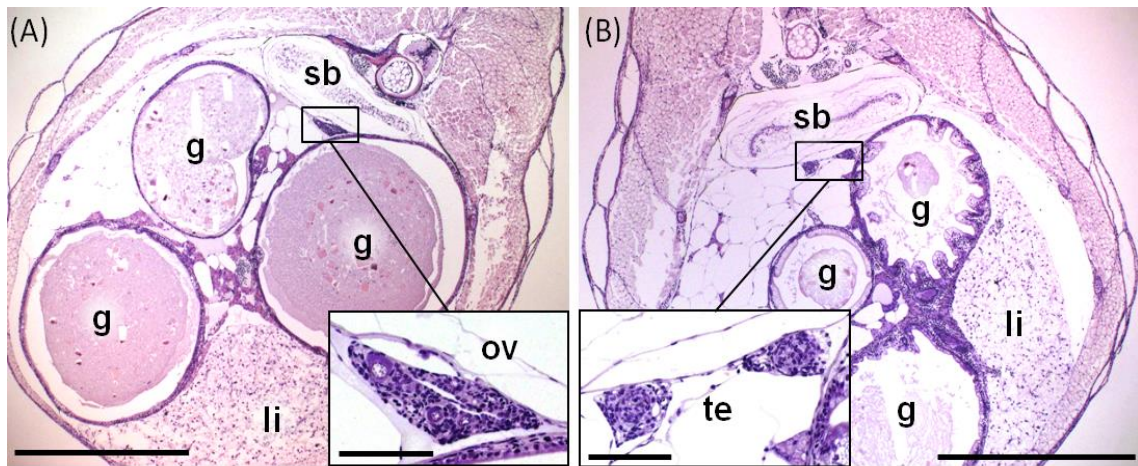

**Figure S3:** Transverse whole body sections of *Xenotoca eiseni* immediately after birth showing the position of the gonads and a more detailed view of these gonads (inset). **A** Section of a female fish. **B** Section of a male fish. **Key:** g: gut, li: liver, ov: ovary, sb swim bladder (not yet inflated), te: testis. Bars = 500 µm and 50 µm (insets).



## Supplementary Material

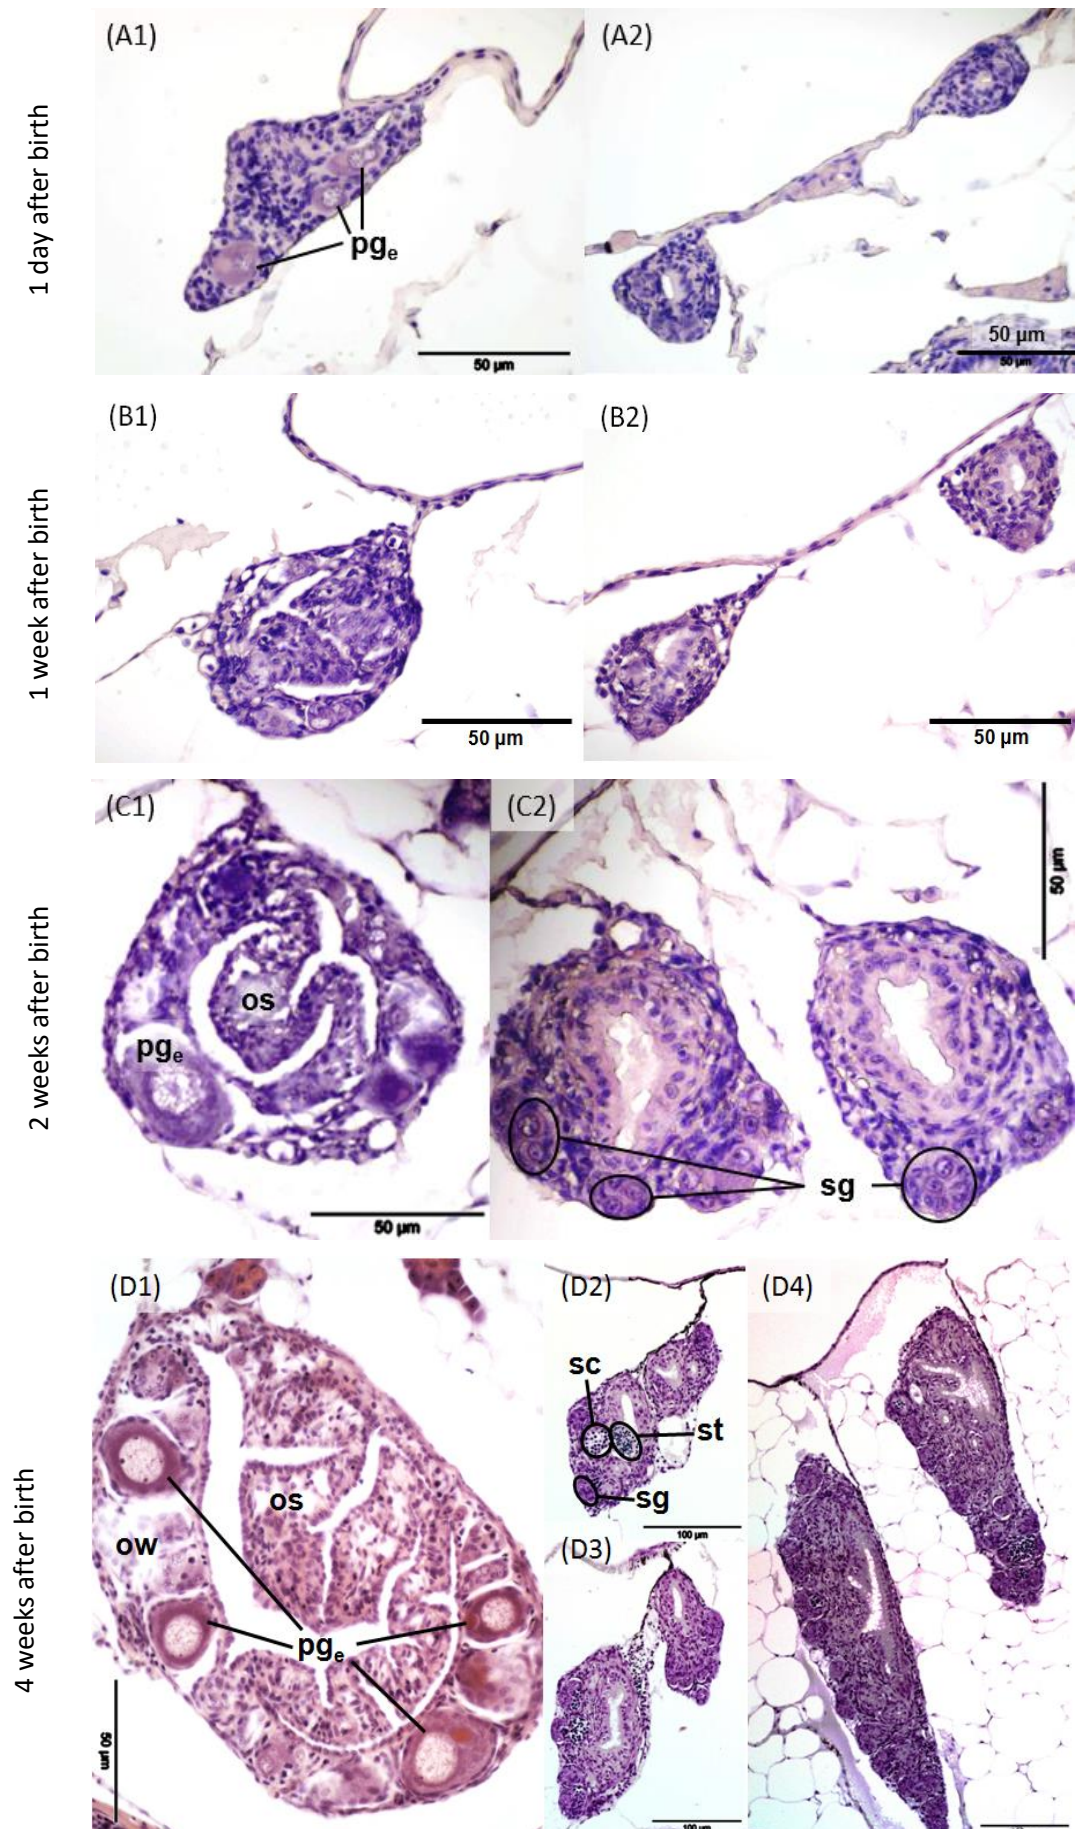

## Supplementary Material

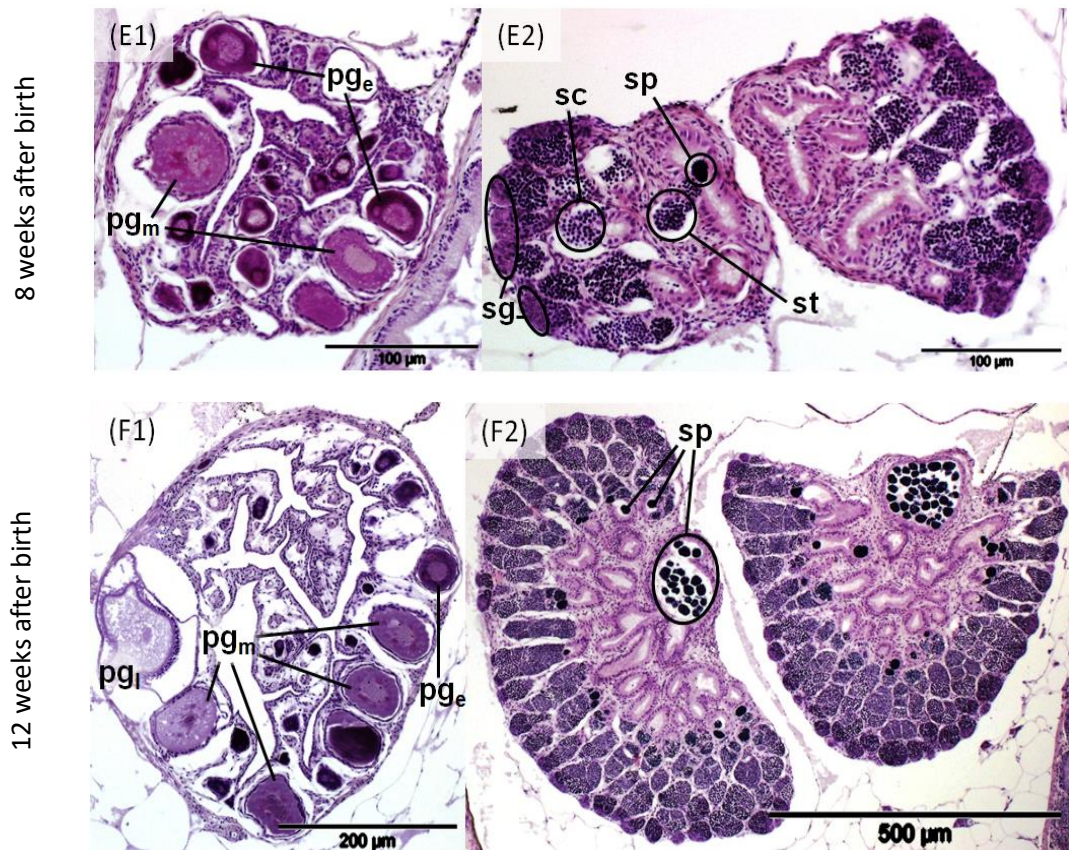

**Figure S4:** Sections of *Xenotoca eiseni* at different ages, focused on the gonads. **Female** fish: A1, B1, C1, D1, E1, F1. **Male** fish: A2, B2, C2, D2-4, E2, F2. **A1-2:** Transverse sections of gonads of one day-old fish. **B1-2:** Transverse sections of gonads of one week-old fish. **C1-2:** Transverse sections of gonads of two week-old fish. **D1-4:** Transverse sections of gonads of four week-old fish. **E1-2:** Transverse sections of gonads of eight week-old fish. **F1-2:** Transverse sections of gonads of twelve week-old fish. **Key:** os: ovarian septum, ow: ovarian wall, pge: early primary growth oocyte, pgl: late primary growth oocyte, pgm: mid primary growth oocyte, sc: spermatocyte, sg: spermatogonium, sp: sperm package, st: spermatid.



## Supplementary Material

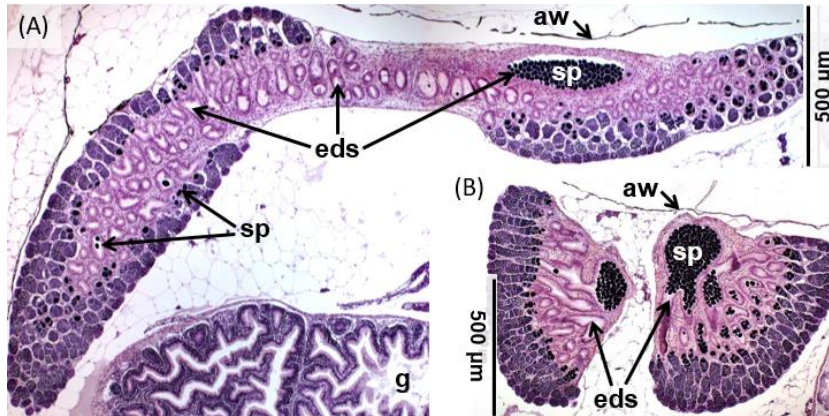

**Figure S5:** Histological sections of *Xenotoca eiseni* testes. **A** Lateral section of an adult male fish. **B** Transverse section of an adult male fish. **Key:** aw: abdominal wall, eds: efferent duct system, g: gut, sp: sperm package.



## *Supplementary Material*

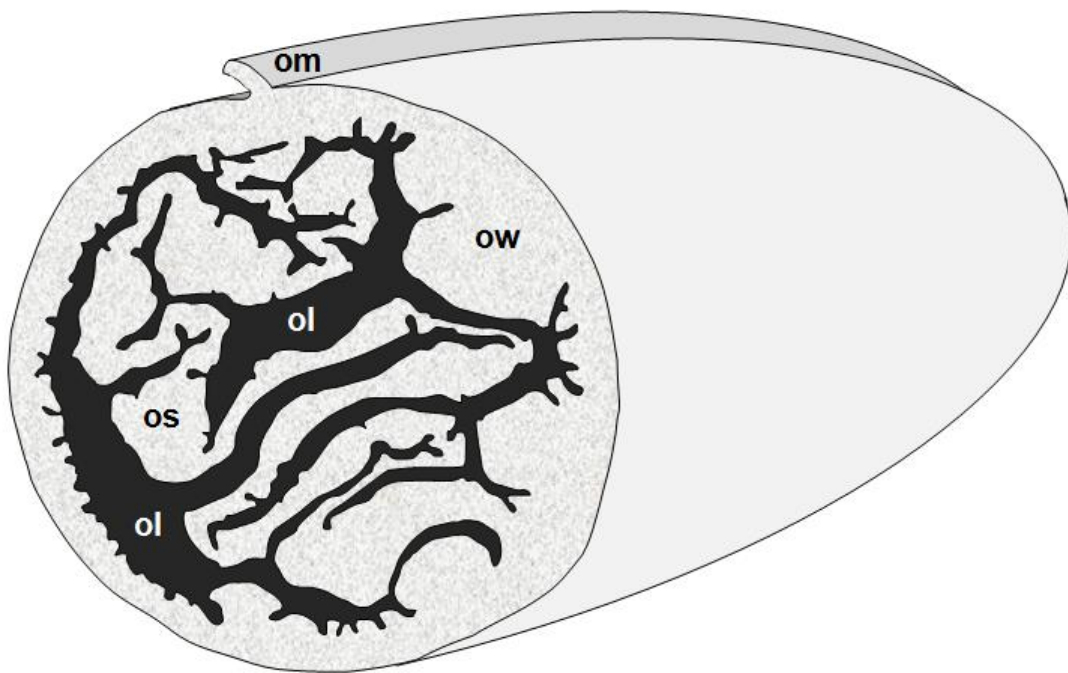

**Figure S6:** Scheme of a mature, non-gravid ovary; oocytes not shown. **Key:** ol: ovarian lumen, om: ovarian mesentery, os: ovarian septum, ow: ovarian wall.

## Supplementary Material

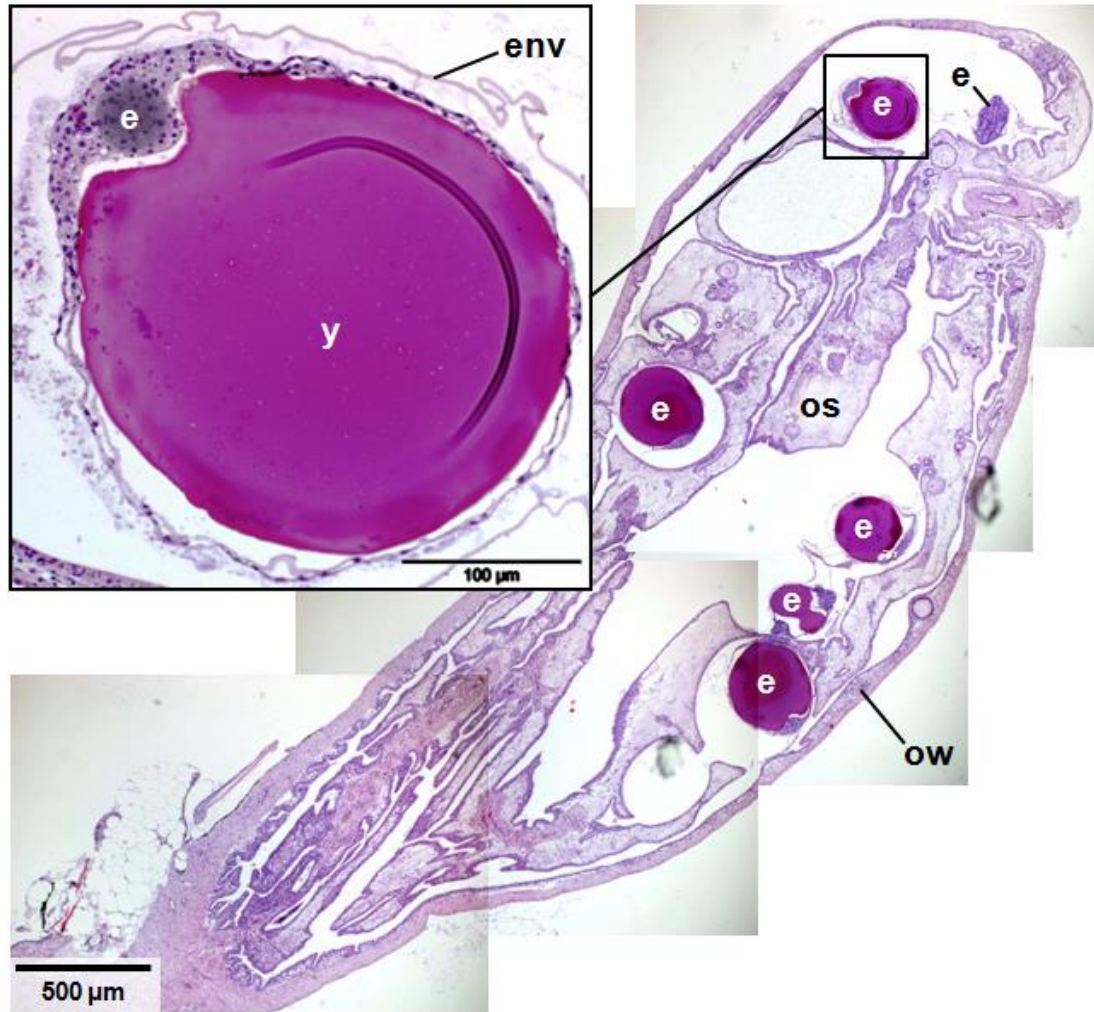

**Figure S7:** Lateral histological section of an ovary of *Xenotoca eiseni* one week after fertilization. Embryos develop freely in the ovarian lumen but are still within the egg envelope. **Key:** e: embryo, env: egg envelope, os: ovarian septum, ow: ovarian wall, y: yolk.

## Supplementary Material

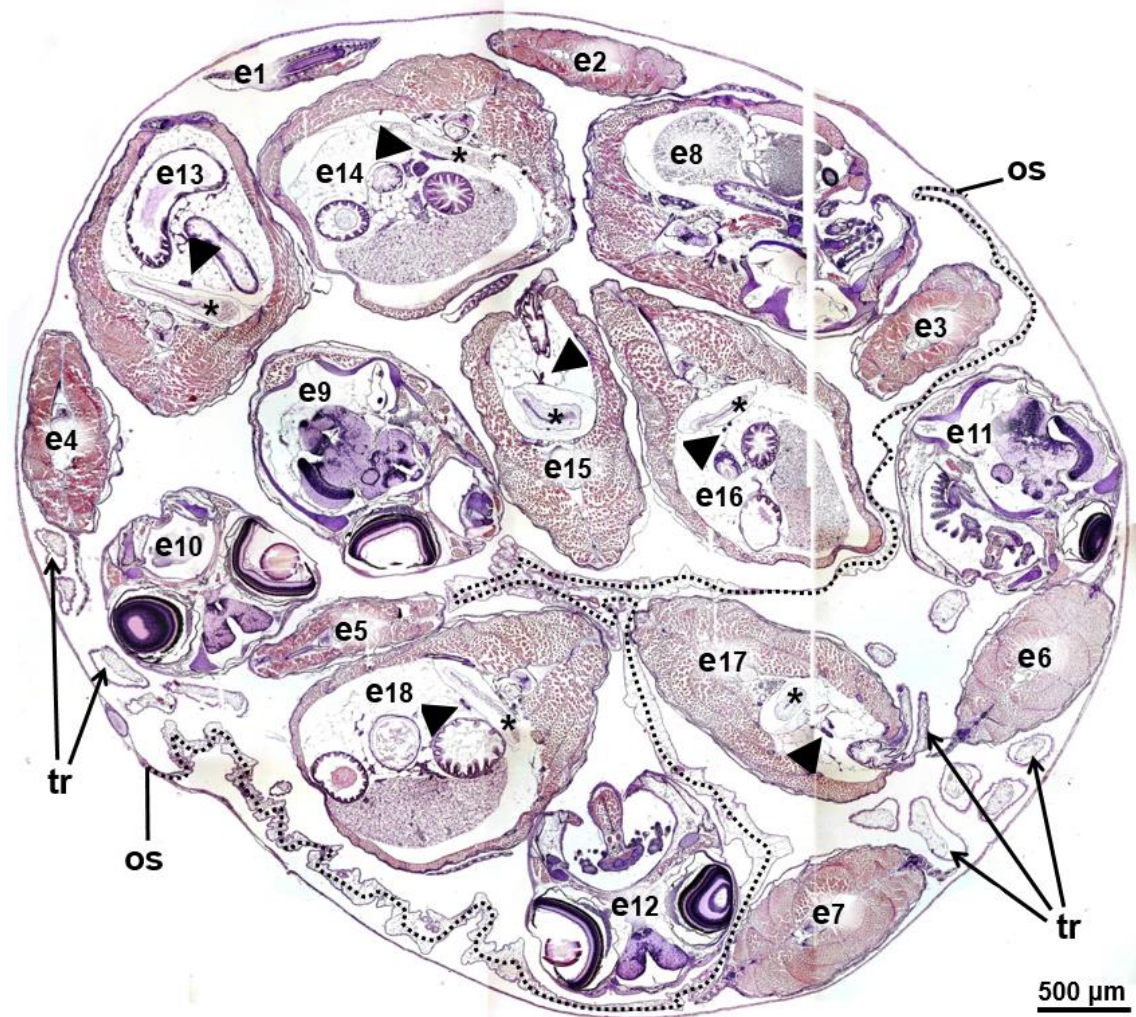

**Figure S8:** Transverse histological section of an ovary (six weeks into gestation) of *Xenotoca eiseni* with 18 embryos. The image shows seven embryos (e1-7) sectioned through the tail, five embryos (e8-12) sectioned through the head and six embryos (e13-18) sectioned through the abdomen. Of the last six embryos, two (e13-14) have presumptive female gonads, three (e15-17) have presumptive male gonads and one (e18) has a gonad that is not determinable. The dotted line highlights the folds of the ovarian septum. **Key:** e: embryo, os: ovarian septum, tr: trophotaeniae; arrows are pointing to the gonads, asterisks are marking the (not yet inflated) swim bladders.

## *Supplementary Material*

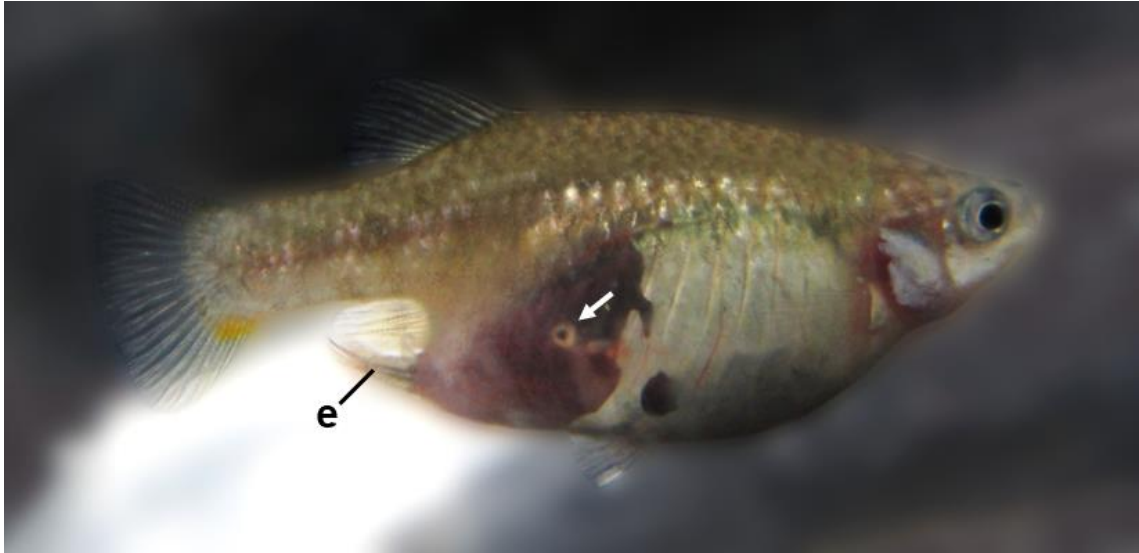

**Figure S9:** Female *Xenotoca eiseni* at parturition. One embryo (e) is being born while the eye of another one can be seen through the abdominal and the ovarian walls of the mother fish.
